# Supplementary material
Source: PubMed Central journal article supplement (PMC5228135)
Supplement: ACI-07-0930-s001.pdf [file ACI-07-0930-s001.pdf]

<http://dx.doi.org/10.4338/ACI-2016-05-RA-0075>

**Supplementary Table I. Pre-electronic health record implementation survey**

| <b>Data Entry (Methods, Timing and Location)</b>                                                                                                            |       |        |           |       |                 |                       |
|-------------------------------------------------------------------------------------------------------------------------------------------------------------|-------|--------|-----------|-------|-----------------|-----------------------|
| <b>How often do you use the following for clinical documentation? (Can choose more than one)</b>                                                            |       |        |           |       |                 |                       |
|                                                                                                                                                             | Never | Rarely | Sometimes | Often | All of the Time | Not sure what this is |
| • Handwritten paper notes                                                                                                                                   |       |        |           |       |                 |                       |
| • Electronic documentation in CareWeb                                                                                                                       |       |        |           |       |                 |                       |
| <b>When you choose to enter data in CareWeb, how often do you use each of the following methods? (Can choose more than one)</b>                             |       |        |           |       |                 |                       |
|                                                                                                                                                             | Never | Rarely | Sometimes | Often | All of the Time | Not sure what this is |
| • Full dictation                                                                                                                                            |       |        |           |       |                 |                       |
| • Imaging of paper notes                                                                                                                                    |       |        |           |       |                 |                       |
| • Typing using a template                                                                                                                                   |       |        |           |       |                 |                       |
| <b>With what frequency do you enter data into the medical record (including dictation) at the following times and locations? (Can choose more than one)</b> |       |        |           |       |                 |                       |
|                                                                                                                                                             | Never | Rarely | Sometimes | Often | All of the      | Not sure what this is |

|                                                                                           |                   |                   |         |                |                |  |
|-------------------------------------------------------------------------------------------|-------------------|-------------------|---------|----------------|----------------|--|
|                                                                                           |                   |                   |         |                | Time           |  |
| • On clinical workdays – in the patient rooms with patients                               |                   |                   |         |                |                |  |
| • On clinical workdays – between patients                                                 |                   |                   |         |                |                |  |
| • On clinical workdays – evenings/nights                                                  |                   |                   |         |                |                |  |
| • On non-clinical/administrative workdays                                                 |                   |                   |         |                |                |  |
| • On my days off (weekdays or weekends)                                                   |                   |                   |         |                |                |  |
| <b>Communication</b>                                                                      |                   |                   |         |                |                |  |
| <b>The current system (paper chart notes with dictated letters/op notes)...</b>           |                   |                   |         |                |                |  |
|                                                                                           | Disagree strongly | Disagree slightly | Neutral | Agree slightly | Agree strongly |  |
| • Enables me to create high-quality documentation                                         |                   |                   |         |                |                |  |
| • Enables my colleagues to create high-quality documentation (including referral letters) |                   |                   |         |                |                |  |
| • Supports my clinical thought process                                                    |                   |                   |         |                |                |  |

|                                                                                 |                   |                   |         |                |                |  |
|---------------------------------------------------------------------------------|-------------------|-------------------|---------|----------------|----------------|--|
| • Does not interfere with my ability to have face-to-face contact with patients |                   |                   |         |                |                |  |
| • Supports my ability to interact with my patients in a meaningful way          |                   |                   |         |                |                |  |
| <b>Safety</b>                                                                   |                   |                   |         |                |                |  |
| <b>The current system (paper chart notes with dictated letters/op notes)...</b> |                   |                   |         |                |                |  |
|                                                                                 | Disagree strongly | Disagree slightly | Neutral | Agree slightly | Agree strongly |  |
| Has improved patient safety by helping us avoid problems or mistakes            |                   |                   |         |                |                |  |
| <b>Reminders and Alerts</b>                                                     |                   |                   |         |                |                |  |
| <b>The current system (paper chart notes with dictated letters/op notes)...</b> |                   |                   |         |                |                |  |
|                                                                                 | Disagree strongly | Disagree slightly | Neutral | Agree slightly | Agree strongly |  |
| Reminds me of important actions or items that                                   |                   |                   |         |                |                |  |

|                                                                                                           |                                |                                    |                            |                                    |                                |                                                                     |
|-----------------------------------------------------------------------------------------------------------|--------------------------------|------------------------------------|----------------------------|------------------------------------|--------------------------------|---------------------------------------------------------------------|
| the patient is due for (e.g. labs, studies, procedures vaccines, documentation)                           |                                |                                    |                            |                                    |                                |                                                                     |
| <b>Workflow and Efficiency</b>                                                                            |                                |                                    |                            |                                    |                                |                                                                     |
| <b>The current system (paper chart notes with dictated letters/op notes)...</b>                           |                                |                                    |                            |                                    |                                |                                                                     |
|                                                                                                           | Disagree strongly              | Disagree slightly                  | Neutral                    | Agree slightly                     | Agree strongly                 |                                                                     |
| Enables me to complete documentation in a timely manner                                                   |                                |                                    |                            |                                    |                                |                                                                     |
|                                                                                                           | CareWeb is much less efficient | CareWeb is somewhat less efficient | Neutral—no real difference | CareWeb is somewhat more efficient | CareWeb is much more efficient | I have not used CareWeb or paper charts enough to make a comparison |
| Compared to paper charts, please rate the impact CareWeb has had on your overall efficiency and workflow. |                                |                                    |                            |                                    |                                |                                                                     |
| <b>Training</b>                                                                                           |                                |                                    |                            |                                    |                                |                                                                     |
|                                                                                                           |                                |                                    |                            |                                    |                                |                                                                     |

|                                                                                                                                                    |                 |                              |                  |                   |                      |  |
|----------------------------------------------------------------------------------------------------------------------------------------------------|-----------------|------------------------------|------------------|-------------------|----------------------|--|
|                                                                                                                                                    | None            | Some                         | All              |                   |                      |  |
| How much MiChart training have you received?                                                                                                       |                 |                              |                  |                   |                      |  |
|                                                                                                                                                    | Very inadequate | Somewhat inadequate          | Neutral          | Somewhat adequate | Very adequate        |  |
| The amount of training you received for MiChart was:                                                                                               |                 |                              |                  |                   |                      |  |
| <b>Prior Experience</b>                                                                                                                            |                 |                              |                  |                   |                      |  |
|                                                                                                                                                    | None            | Some, but less than one year | One to two years | Two to four years | More than four years |  |
| Estimate how much prior experience you had with MiChart (also known as Epic) in your clinical practice before coming to the University of Michigan |                 |                              |                  |                   |                      |  |
| <b>Job Satisfaction</b>                                                                                                                            |                 |                              |                  |                   |                      |  |
|                                                                                                                                                    | Very            | Slightly                     | Neutral          | Slightly          | Very satisfied       |  |

|                                                                                                                                                     |                                      |                                 |         |                                  |                                    |  |
|-----------------------------------------------------------------------------------------------------------------------------------------------------|--------------------------------------|---------------------------------|---------|----------------------------------|------------------------------------|--|
|                                                                                                                                                     | unsatisfied                          | unsatisfied                     |         | satisfied                        |                                    |  |
| Please rate your current overall job satisfaction                                                                                                   |                                      |                                 |         |                                  |                                    |  |
|                                                                                                                                                     | Very big<br>negative<br>impact       | Slight negative<br>impact       | Neutral | Slight positive<br>impact        | Very big<br>positive<br>impact     |  |
| Please estimate the impact CareWeb has had on your overall job satisfaction                                                                         |                                      |                                 |         |                                  |                                    |  |
|                                                                                                                                                     |                                      |                                 |         |                                  |                                    |  |
| <b>Looking forward</b>                                                                                                                              |                                      |                                 |         |                                  |                                    |  |
|                                                                                                                                                     |                                      |                                 |         |                                  |                                    |  |
|                                                                                                                                                     | Disagree<br>strongly                 | Disagree<br>slightly            | Neutral | Agree slightly                   | Agree<br>strongly                  |  |
| Are you confident that MiChart will allow you to provide better care for your patients than using paper chart notes with dictated letters/op-notes? |                                      |                                 |         |                                  |                                    |  |
|                                                                                                                                                     | Definitely<br>keep current<br>system | Probably keep<br>current system | Neutral | Probably<br>switch to<br>MiChart | Definitely<br>switch to<br>MiChart |  |
| Based on everything you currently know,                                                                                                             |                                      |                                 |         |                                  |                                    |  |

|                                                                                    |  |  |  |  |  |  |
|------------------------------------------------------------------------------------|--|--|--|--|--|--|
| would you like to keep the current system of<br>paper charts or switch to MiChart? |  |  |  |  |  |  |
|------------------------------------------------------------------------------------|--|--|--|--|--|--|

**Please tell us anything else you would like us to know about your experiences and perceptions so far related to the switch from the current system to MiChart. The can be about the topics covered in this survey or anything else you think is important:**
