# Supplementary material
Source: PubMed Central journal article supplement (PMC5228135)
Supplement: ACI-07-0930-s002.pdf [file ACI-07-0930-s002.pdf]

**Supplementary Table II. Post-electronic health record implementation survey**

| <b>Data Entry (Methods, Timing and Location)</b>                                                                                                            |       |        |           |       |                 |                       |
|-------------------------------------------------------------------------------------------------------------------------------------------------------------|-------|--------|-----------|-------|-----------------|-----------------------|
| <b>When you enter data in MiChart, how often do you use each of the following methods? (Can choose more than one)</b>                                       |       |        |           |       |                 |                       |
|                                                                                                                                                             | Never | Rarely | Sometimes | Often | All of the Time | Not sure what this is |
| • Full telephone dictation to Central Transcription Service                                                                                                 |       |        |           |       |                 |                       |
| • Partial telephone dictation to Central Transcription Service                                                                                              |       |        |           |       |                 |                       |
| • Traditional dictaphone dictation                                                                                                                          |       |        |           |       |                 |                       |
| • Typing into empty text box                                                                                                                                |       |        |           |       |                 |                       |
| • Note Writer                                                                                                                                               |       |        |           |       |                 |                       |
| • Smart text (“template”)                                                                                                                                   |       |        |           |       |                 |                       |
| • Smart Phrase (“dot phrase” shortcut)                                                                                                                      |       |        |           |       |                 |                       |
| <b>With what frequency do you enter data into the medical record (including dictation) at the following times and locations? (Can choose more than one)</b> |       |        |           |       |                 |                       |
|                                                                                                                                                             | Never | Rarely | Sometimes | Often | All of the Time | Not sure what this is |
| • On clinical workdays – in the patient rooms with patients                                                                                                 |       |        |           |       |                 |                       |

|                                           |  |  |  |  |  |  |
|-------------------------------------------|--|--|--|--|--|--|
| • On clinical workdays – between patients |  |  |  |  |  |  |
| • On clinical workdays – evenings/nights  |  |  |  |  |  |  |
| • On non-clinical/administrative workdays |  |  |  |  |  |  |
| • On my days off (weekdays or weekends)   |  |  |  |  |  |  |

**Communication**

**The current system (paper chart notes with dictated letters/op notes)...**

|                                                                                           | Disagree<br>strongly | Disagree<br>slightly | Neutral | Agree slightly | Agree strongly |  |
|-------------------------------------------------------------------------------------------|----------------------|----------------------|---------|----------------|----------------|--|
| • Enables me to create high-quality documentation                                         |                      |                      |         |                |                |  |
| • Enables my colleagues to create high-quality documentation (including referral letters) |                      |                      |         |                |                |  |
| • Supports my clinical thought process                                                    |                      |                      |         |                |                |  |
| • Does not interfere with my ability to have face-to-face contact with patients           |                      |                      |         |                |                |  |
| • Supports my ability to interact with my patients in a meaningful way                    |                      |                      |         |                |                |  |

**Safety**

| <b>The current system (paper chart notes with dictated letters/op notes)...</b>                                                                                                     |                      |                      |         |                |                |  |
|-------------------------------------------------------------------------------------------------------------------------------------------------------------------------------------|----------------------|----------------------|---------|----------------|----------------|--|
|                                                                                                                                                                                     | Disagree<br>strongly | Disagree<br>slightly | Neutral | Agree slightly | Agree strongly |  |
| Has improved patient safety by helping us avoid problems or mistakes                                                                                                                |                      |                      |         |                |                |  |
| <b>Reminders and Alerts</b>                                                                                                                                                         |                      |                      |         |                |                |  |
| <b>The current system (paper chart notes with dictated letters/op notes)...</b>                                                                                                     |                      |                      |         |                |                |  |
|                                                                                                                                                                                     | Disagree<br>strongly | Disagree<br>slightly | Neutral | Agree slightly | Agree strongly |  |
| Reminds me of important actions or items that the patient is due for (e.g. labs, studies, procedures vaccines, documentation). These include MiChart “Best Practice Alerts” (BPAs). |                      |                      |         |                |                |  |
| <b>Workflow and Efficiency</b>                                                                                                                                                      |                      |                      |         |                |                |  |
| <b>The current system (paper chart notes with dictated letters/op notes)...</b>                                                                                                     |                      |                      |         |                |                |  |
|                                                                                                                                                                                     | Disagree             | Disagree             | Neutral | Agree slightly | Agree strongly |  |

|                                                                                                                                                                      |                                |                                    |                            |                                    |                                |                                                          |
|----------------------------------------------------------------------------------------------------------------------------------------------------------------------|--------------------------------|------------------------------------|----------------------------|------------------------------------|--------------------------------|----------------------------------------------------------|
|                                                                                                                                                                      | strongly                       | slightly                           |                            |                                    |                                |                                                          |
| • Has eliminated work that I used to have to do                                                                                                                      |                                |                                    |                            |                                    |                                |                                                          |
| • Has created new work that I now must do                                                                                                                            |                                |                                    |                            |                                    |                                |                                                          |
| • Enables me to complete documentation in a timely manner                                                                                                            |                                |                                    |                            |                                    |                                |                                                          |
|                                                                                                                                                                      | MiChart is much less efficient | MiChart is somewhat less efficient | Neutral—no real difference | MiChart is somewhat more efficient | MiChart is much more efficient | I have not used paper charts enough to make a comparison |
| Compared to the previous system of paper chart notes with dictated letters/op-notes, please rate the impact MiChart has had on your overall efficiency and workflow. |                                |                                    |                            |                                    |                                |                                                          |
| <b>Training</b>                                                                                                                                                      |                                |                                    |                            |                                    |                                |                                                          |
|                                                                                                                                                                      | None                           | Some                               | All                        |                                    |                                |                                                          |
| How much MiChart training have you received?                                                                                                                         |                                |                                    |                            |                                    |                                |                                                          |
|                                                                                                                                                                      | Very inadequate                | Somewhat inadequate                | Neutral                    | Somewhat adequate                  | Very adequate                  |                                                          |
| The amount of training you received for MiChart                                                                                                                      |                                |                                    |                            |                                    |                                |                                                          |

|                                                                                                                                                    |                          |                              |                  |                        |                          |  |
|----------------------------------------------------------------------------------------------------------------------------------------------------|--------------------------|------------------------------|------------------|------------------------|--------------------------|--|
| was:                                                                                                                                               |                          |                              |                  |                        |                          |  |
| <b>Prior Experience</b>                                                                                                                            |                          |                              |                  |                        |                          |  |
|                                                                                                                                                    | None                     | Some, but less than one year | One to two years | Two to four years      | More than four years     |  |
| Estimate how much prior experience you had with MiChart (also known as Epic) in your clinical practice before coming to the University of Michigan |                          |                              |                  |                        |                          |  |
| <b>Job Satisfaction</b>                                                                                                                            |                          |                              |                  |                        |                          |  |
|                                                                                                                                                    | Very unsatisfied         | Slightly unsatisfied         | Neutral          | Slightly satisfied     | Very satisfied           |  |
| Please rate your current overall job satisfaction                                                                                                  |                          |                              |                  |                        |                          |  |
|                                                                                                                                                    | Very big negative impact | Slight negative impact       | Neutral          | Slight positive impact | Very big positive impact |  |
| Please estimate the impact MiChart has had on your overall job satisfaction                                                                        |                          |                              |                  |                        |                          |  |

| <b>Miscellaneous</b>                                                                                                                                           |                            |                          |         |                                                  |                                                    |  |
|----------------------------------------------------------------------------------------------------------------------------------------------------------------|----------------------------|--------------------------|---------|--------------------------------------------------|----------------------------------------------------|--|
|                                                                                                                                                                | Disagree<br>strongly       | Disagree<br>slightly     | Neutral | Agree slightly                                   | Agree strongly                                     |  |
| I am confident that MiChart will allow me to provide better care for my patients than the previous system of paper chart notes with dictated letters/op-notes? |                            |                          |         |                                                  |                                                    |  |
| <b>Looking Back</b>                                                                                                                                            |                            |                          |         |                                                  |                                                    |  |
|                                                                                                                                                                | Definitely<br>keep MiChart | Probably keep<br>MiChart | Neutral | Probably<br>switch back to<br>previous<br>system | Definitely<br>switch back to<br>previous<br>system |  |
| Based on everything you currently know, would you like to keep MiChart, or switch back to the previous system of paper charts with dictated letters/op-notes?  |                            |                          |         |                                                  |                                                    |  |

**Please tell us anything else you would like us to know about your experiences and perceptions so far related to the switch from the current system to MiChart. The can be about the topics covered in this survey or anything else you think is important:**
