# Supplementary material
Source: PubMed Central journal article supplement (PMC5228135)
Supplement: ACI-07-0930-s003.pdf [file ACI-07-0930-s003.pdf]

**Supplementary Table III. MiChart implementation survey responses from a group of 62 ophthalmologists, N (column %).** Survey results from all questions are presented.

|                                                             |                           | Survey Time        |                             |                             |                              |                            | p-value <sup>a</sup> |
|-------------------------------------------------------------|---------------------------|--------------------|-----------------------------|-----------------------------|------------------------------|----------------------------|----------------------|
|                                                             |                           | Pre-Implementation | 3 Month Post-Implementation | 7 Month Post-Implementation | 13 Month Post-Implementation | 2 Year Post-Implementation |                      |
| Number of Surveys Completed                                 |                           | 32                 | 28                          | 35                          | 40                           | 39                         |                      |
| Gender                                                      | Male                      | 20 (62.5)          | 17 (60.7)                   | 21 (60.0)                   | 22 (55.0)                    | 21 (53.8)                  | 0.93 <sup>b</sup>    |
|                                                             | Female                    | 12 (37.5)          | 11 (39.3)                   | 14 (40.0)                   | 18 (45.0)                    | 18 (46.2)                  |                      |
| Age                                                         | 30-39                     | 10 (31.3)          | 10 (35.7)                   | 10 (28.6)                   | 15 (37.5)                    | 14 (35.9)                  | 0.95 <sup>c</sup>    |
|                                                             | 40-49                     | 9 (28.1)           | 6 (21.4)                    | 12 (34.3)                   | 11 (27.5)                    | 12 (30.8)                  |                      |
|                                                             | 50-59                     | 5 (15.6)           | 5 (17.9)                    | 7 (20.0)                    | 9 (22.5)                     | 9 (23.1)                   |                      |
|                                                             | 60-69                     | 5 (15.6)           | 5 (17.9)                    | 5 (14.3)                    | 5 (12.5)                     | 3 (7.7)                    |                      |
|                                                             | 70-79                     | 3 (9.4)            | 2 (7.1)                     | 1 (2.9)                     | 0 (0.0)                      | 1 (2.6)                    |                      |
| Question                                                    | Responses                 |                    |                             |                             |                              |                            |                      |
| How often do you use handwritten notes for documentation?   | 1 – Never                 | 0 (0.0)            | 0 (0.0)                     | 0 (0.0)                     | 0 (0.0)                      | 0 (0.0)                    | ----- <sup>e</sup>   |
|                                                             | 2                         | 0 (0.0)            | 0 (0.0)                     | 0 (0.0)                     | 0 (0.0)                      | 0 (0.0)                    |                      |
|                                                             | 3                         | 0 (0.0)            | 0 (0.0)                     | 0 (0.0)                     | 0 (0.0)                      | 0 (0.0)                    |                      |
|                                                             | 4                         | 4 (12.5)           | 0 (0.0)                     | 0 (0.0)                     | 0 (0.0)                      | 0 (0.0)                    |                      |
|                                                             | 5 – All of the time       | 28 (87.5)          | 0 (0.0)                     | 0 (0.0)                     | 0 (0.0)                      | 0 (0.0)                    |                      |
|                                                             | Non-Response <sup>d</sup> | 30                 | 61                          | 61                          | 56                           | 58                         |                      |
| How often do you use CareWeb for documentation?             | 1 – Never                 | 4 (12.5)           | 0 (0.0)                     | 0 (0.0)                     | 0 (0.0)                      | 0 (0.0)                    | ----- <sup>e</sup>   |
|                                                             | 2                         | 8 (25.0)           | 0 (0.0)                     | 0 (0.0)                     | 0 (0.0)                      | 0 (0.0)                    |                      |
|                                                             | 3                         | 7 (21.9)           | 0 (0.0)                     | 0 (0.0)                     | 0 (0.0)                      | 0 (0.0)                    |                      |
|                                                             | 4                         | 9 (28.1)           | 0 (0.0)                     | 0 (0.0)                     | 0 (0.0)                      | 0 (0.0)                    |                      |
|                                                             | 5 – All of the time       | 4 (12.5)           | 0 (0.0)                     | 0 (0.0)                     | 0 (0.0)                      | 0 (0.0)                    |                      |
|                                                             | Non-Response              | 30                 | 61                          | 61                          | 56                           | 58                         |                      |
| When using CareWeb, how often do you use full dictation?    | 1 – Never                 | 10 (31.3)          | 0 (0.0)                     | 0 (0.0)                     | 0 (0.0)                      | 0 (0.0)                    | ----- <sup>e</sup>   |
|                                                             | 2                         | 3 (9.4)            | 0 (0.0)                     | 0 (0.0)                     | 0 (0.0)                      | 0 (0.0)                    |                      |
|                                                             | 3                         | 5 (15.6)           | 0 (0.0)                     | 0 (0.0)                     | 0 (0.0)                      | 0 (0.0)                    |                      |
|                                                             | 4                         | 7 (21.9)           | 0 (0.0)                     | 0 (0.0)                     | 0 (0.0)                      | 0 (0.0)                    |                      |
|                                                             | 5 – All of the time       | 7 (21.9)           | 0 (0.0)                     | 0 (0.0)                     | 0 (0.0)                      | 0 (0.0)                    |                      |
|                                                             | Non-Response              | 30                 | 61                          | 61                          | 56                           | 58                         |                      |
| When using CareWeb, how often do you image paper notes?     | 1 – Never                 | 1 (3.1)            | 0 (0.0)                     | 0 (0.0)                     | 0 (0.0)                      | 0 (0.0)                    | ----- <sup>e</sup>   |
|                                                             | 2                         | 0 (0.0)            | 0 (0.0)                     | 0 (0.0)                     | 0 (0.0)                      | 0 (0.0)                    |                      |
|                                                             | 3                         | 0 (0.0)            | 0 (0.0)                     | 0 (0.0)                     | 0 (0.0)                      | 0 (0.0)                    |                      |
|                                                             | 4                         | 4 (12.5)           | 0 (0.0)                     | 0 (0.0)                     | 0 (0.0)                      | 0 (0.0)                    |                      |
|                                                             | 5 – All of the time       | 27 (84.4)          | 0 (0.0)                     | 0 (0.0)                     | 0 (0.0)                      | 0 (0.0)                    |                      |
|                                                             | Non-Response              | 30                 | 61                          | 61                          | 56                           | 58                         |                      |
| When using CareWeb, how often do you type using a template? | 1 – Never                 | 17 (54.8)          | 0 (0.0)                     | 0 (0.0)                     | 0 (0.0)                      | 0 (0.0)                    | ----- <sup>e</sup>   |
|                                                             | 2                         | 7 (22.6)           | 0 (0.0)                     | 0 (0.0)                     | 0 (0.0)                      | 0 (0.0)                    |                      |
|                                                             | 3                         | 3 (9.7)            | 0 (0.0)                     | 0 (0.0)                     | 0 (0.0)                      | 0 (0.0)                    |                      |
|                                                             | 4                         | 2 (6.5)            | 0 (0.0)                     | 0 (0.0)                     | 0 (0.0)                      | 0 (0.0)                    |                      |
|                                                             | 5 – All of the time       | 2 (6.5)            | 0 (0.0)                     | 0 (0.0)                     | 0 (0.0)                      | 0 (0.0)                    |                      |
|                                                             | Non-Response              | 31                 | 61                          | 61                          | 56                           | 58                         |                      |

|                                                                       |                     |         |           |           |           |           |                     |
|-----------------------------------------------------------------------|---------------------|---------|-----------|-----------|-----------|-----------|---------------------|
| When using MiChart, how often do you use full telephone dictation?    | 1 – Never           | 0 (0.0) | 20 (74.1) | 20 (87.0) | 36 (90.0) | 35 (89.7) | 0.10 <sup>c</sup>   |
|                                                                       | 2                   | 0 (0.0) | 4 (14.8)  | 2 (8.7)   | 1 (2.5)   | 1 (2.6)   |                     |
|                                                                       | 3                   | 0 (0.0) | 2 (7.4)   | 0 (0.0)   | 0 (0.0)   | 3 (7.7)   |                     |
|                                                                       | 4                   | 0 (0.0) | 1 (3.7)   | 1 (4.3)   | 1 (2.5)   | 0 (0.0)   |                     |
|                                                                       | 5 – All of the time | 0 (0.0) | 0 (0.0)   | 0 (0.0)   | 2 (5.0)   | 0 (0.0)   |                     |
|                                                                       | Non-Response        | 62      | 34        | 38        | 16        | 19        |                     |
| When using MiChart, how often do you use partial telephone dictation? | 1 – Never           | 0 (0.0) | 22 (81.5) | 28 (80.0) | 35 (89.7) | 38 (97.4) | 0.41 <sup>c</sup>   |
|                                                                       | 2                   | 0 (0.0) | 1 (3.7)   | 2 (5.7)   | 2 (5.1)   | 1 (2.6)   |                     |
|                                                                       | 3                   | 0 (0.0) | 1 (3.7)   | 2 (5.7)   | 1 (2.6)   | 0 (0.0)   |                     |
|                                                                       | 4                   | 0 (0.0) | 2 (7.4)   | 3 (8.6)   | 1 (2.6)   | 0 (0.0)   |                     |
|                                                                       | 5 – All of the time | 0 (0.0) | 1 (3.7)   | 0 (0.0)   | 0 (0.0)   | 0 (0.0)   |                     |
|                                                                       | Non-Response        | 62      | 34        | 26        | 17        | 19        |                     |
| When using MiChart, how often do you use Dictaphone dictation?        | 1 – Never           | 0 (0.0) | 14 (53.8) | 17 (48.6) | 24 (60.0) | 27 (69.2) | 0.45 <sup>c</sup>   |
|                                                                       | 2                   | 0 (0.0) | 1 (3.8)   | 4 (11.4)  | 3 (7.5)   | 5 (12.8)  |                     |
|                                                                       | 3                   | 0 (0.0) | 4 (15.4)  | 5 (14.3)  | 6 (15.0)  | 1 (2.6)   |                     |
|                                                                       | 4                   | 0 (0.0) | 5 (19.2)  | 6 (17.1)  | 3 (7.5)   | 2 (5.1)   |                     |
|                                                                       | 5 – All of the time | 0 (0.0) | 2 (7.7)   | 3 (8.6)   | 4 (10.0)  | 4 (10.3)  |                     |
|                                                                       | Non-Response        | 62      | 35        | 26        | 16        | 19        |                     |
| When using MiChart, how often do you type into empty text box?        | 1 – Never           | 0 (0.0) | 4 (14.8)  | 12 (34.3) | 0 (0.0)   | 0 (0.0)   | < 0.01 <sup>c</sup> |
|                                                                       | 2                   | 0 (0.0) | 6 (22.2)  | 1 (2.9)   | 2 (5.0)   | 3 (7.9)   |                     |
|                                                                       | 3                   | 0 (0.0) | 2 (7.4)   | 5 (14.3)  | 3 (7.5)   | 3 (7.9)   |                     |
|                                                                       | 4                   | 0 (0.0) | 7 (25.9)  | 4 (11.4)  | 20 (50.0) | 13 (34.2) |                     |
|                                                                       | 5 – All of the time | 0 (0.0) | 8 (29.6)  | 13 (37.1) | 15 (37.5) | 19 (50.0) |                     |
|                                                                       | Non-Response        | 62      | 34        | 26        | 16        | 20        |                     |
| When using MiChart, how often do you use Note Writer?                 | 1 – Never           | 0 (0.0) | 19 (67.9) | 19 (54.3) | 28 (71.8) | 25 (71.4) | 0.42 <sup>c</sup>   |
|                                                                       | 2                   | 0 (0.0) | 2 (7.1)   | 1 (2.9)   | 3 (7.7)   | 3 (8.6)   |                     |
|                                                                       | 3                   | 0 (0.0) | 0 (0.0)   | 3 (8.6)   | 3 (7.7)   | 1 (2.9)   |                     |
|                                                                       | 4                   | 0 (0.0) | 3 (10.7)  | 7 (20.0)  | 2 (5.1)   | 1 (2.9)   |                     |
|                                                                       | 5 – All of the time | 0 (0.0) | 4 (14.3)  | 5 (14.3)  | 3 (7.7)   | 5 (14.3)  |                     |
|                                                                       | Non-Response        | 62      | 33        | 26        | 17        | 23        |                     |
| When using MiChart, how often do you use Smart Text template?         | 1 – Never           | 0 (0.0) | 5 (18.5)  | 6 (17.1)  | 7 (17.5)  | 4 (10.3)  | 0.500 <sup>c</sup>  |
|                                                                       | 2                   | 0 (0.0) | 4 (14.8)  | 4 (11.4)  | 1 (2.5)   | 1 (2.6)   |                     |
|                                                                       | 3                   | 0 (0.0) | 4 (14.8)  | 5 (14.3)  | 11 (27.5) | 10 (25.6) |                     |
|                                                                       | 4                   | 0 (0.0) | 10 (37.0) | 13 (37.1) | 11 (27.5) | 12 (30.8) |                     |
|                                                                       | 5 – All of the time | 0 (0.0) | 4 (14.8)  | 7 (20.0)  | 10 (25.0) | 12 (30.8) |                     |
|                                                                       | Non-Response        | 62      | 34        | 26        | 16        | 19        |                     |
| When using MiChart, how often do you use Smart Phrase shortcut?       | 1 – Never           | 0 (0.0) | 2 (7.1)   | 5 (17.2)  | 1 (2.5)   | 0 (0.0)   | 0.062 <sup>c</sup>  |
|                                                                       | 2                   | 0 (0.0) | 1 (3.6)   | 2 (6.9)   | 3 (7.5)   | 0 (0.0)   |                     |
|                                                                       | 3                   | 0 (0.0) | 1 (3.6)   | 2 (6.9)   | 8 (20.0)  | 6 (15.4)  |                     |
|                                                                       | 4                   | 0 (0.0) | 10 (35.7) | 10 (34.5) | 15 (37.5) | 12 (30.8) |                     |
|                                                                       | 5 – All of the time | 0 (0.0) | 14 (50.0) | 10 (34.5) | 13 (32.5) | 21 (53.8) |                     |
|                                                                       | Non-Response        | 62      | 33        | 32        | 16        | 19        |                     |
| When using MiChart, how often do you use scribes?                     | 1 – Never           | 0 (0.0) | 0 (0.0)   | 0 (0.0)   | 27 (69.2) | 17 (44.7) | 0.17 <sup>c</sup>   |
|                                                                       | 2                   | 0 (0.0) | 0 (0.0)   | 0 (0.0)   | 1 (2.6)   | 5 (13.2)  |                     |
|                                                                       | 3                   | 0 (0.0) | 0 (0.0)   | 0 (0.0)   | 2 (5.1)   | 3 (7.9)   |                     |

|                                                                                        |                       |           |           |           |           |           |                    |
|----------------------------------------------------------------------------------------|-----------------------|-----------|-----------|-----------|-----------|-----------|--------------------|
|                                                                                        | 4                     | 0 (0.0)   | 0 (0.0)   | 0 (0.0)   | 5 (12.8)  | 5 (13.2)  |                    |
|                                                                                        | 5 – All of the time   | 0 (0.0)   | 0 (0.0)   | 0 (0.0)   | 4 (10.3)  | 8 (21.1)  |                    |
|                                                                                        | Non-Response          | 62        | 61        | 61        | 17        | 20        |                    |
| With what frequency do you enter data into record while in patient rooms?              | 1 – Never             | 6 (18.8)  | 0 (0.0)   | 0 (0.0)   | 0 (0.0)   | 0 (0.0)   | <0.01 <sup>c</sup> |
|                                                                                        | 2                     | 6 (18.8)  | 0 (0.0)   | 2 (5.7)   | 2 (5.0)   | 0 (0.0)   |                    |
|                                                                                        | 3                     | 5 (15.6)  | 3 (10.7)  | 2 (5.7)   | 4 (10.0)  | 4 (10.3)  |                    |
|                                                                                        | 4                     | 4 (12.5)  | 6 (21.4)  | 10 (28.6) | 7 (17.5)  | 7 (17.9)  |                    |
|                                                                                        | 5 – All of the time   | 11 (34.4) | 19 (67.9) | 21 (60.0) | 27 (67.5) | 28 (71.8) |                    |
|                                                                                        | Non-Response          | 30        | 33        | 26        | 16        | 19        |                    |
| With what frequency do you enter data into record between patients?                    | 1 – Never             | 7 (21.9)  | 1 (3.6)   | 3 (8.6)   | 0 (0.0)   | 0 (0.0)   | 0.07 <sup>c</sup>  |
|                                                                                        | 2                     | 4 (12.5)  | 3 (10.7)  | 2 (5.7)   | 4 (10.0)  | 5 (12.8)  |                    |
|                                                                                        | 3                     | 7 (21.9)  | 8 (28.6)  | 9 (25.7)  | 7 (17.5)  | 7 (17.9)  |                    |
|                                                                                        | 4                     | 9 (28.1)  | 7 (25.0)  | 8 (22.9)  | 16 (40.0) | 10 (25.6) |                    |
|                                                                                        | 5 – All of the time   | 5 (15.6)  | 9 (32.1)  | 13 (37.1) | 13 (32.5) | 17 (43.6) |                    |
|                                                                                        | Non-Response          | 30        | 33        | 26        | 16        | 19        |                    |
| With what frequency do you enter data into record on workday evenings/nights?          | 1 – Never             | 9 (28.1)  | 7 (25.9)  | 7 (20.0)  | 6 (15.0)  | 7 (17.9)  | 0.54 <sup>b</sup>  |
|                                                                                        | 2                     | 5 (15.6)  | 4 (14.8)  | 7 (20.0)  | 10 (25.0) | 12 (30.8) |                    |
|                                                                                        | 3                     | 8 (25.0)  | 7 (25.9)  | 8 (22.9)  | 10 (25.0) | 7 (17.9)  |                    |
|                                                                                        | 4                     | 9 (28.1)  | 6 (22.2)  | 9 (25.7)  | 7 (17.5)  | 4 (10.3)  |                    |
|                                                                                        | 5 – All of the time   | 1 (3.1)   | 3 (11.1)  | 4 (11.4)  | 7 (17.5)  | 9 (23.1)  |                    |
|                                                                                        | Non-Response          | 30        | 34        | 26        | 16        | 19        |                    |
| With what frequency do you enter data into record on non-clinical/administrative days? | 1 – Never             | 13 (40.6) | 9 (33.3)  | 9 (26.5)  | 8 (20.5)  | 9 (23.1)  | 0.40 <sup>b</sup>  |
|                                                                                        | 2                     | 5 (15.6)  | 2 (7.4)   | 8 (23.5)  | 11 (28.2) | 6 (15.4)  |                    |
|                                                                                        | 3                     | 8 (25.0)  | 3 (11.1)  | 5 (14.7)  | 7 (17.9)  | 10 (25.6) |                    |
|                                                                                        | 4                     | 5 (15.6)  | 9 (33.3)  | 8 (23.5)  | 7 (17.9)  | 7 (17.9)  |                    |
|                                                                                        | 5 – All of the time   | 1 (3.1)   | 4 (14.8)  | 4 (11.8)  | 6 (15.4)  | 7 (17.9)  |                    |
|                                                                                        | Non-Response          | 30        | 34        | 27        | 17        | 19        |                    |
| With what frequency do you enter data into record on days off?                         | 1 – Never             | 18 (56.3) | 10 (35.7) | 9 (25.7)  | 13 (32.5) | 15 (38.5) | 0.51 <sup>c</sup>  |
|                                                                                        | 2                     | 5 (15.6)  | 5 (17.9)  | 10 (28.6) | 12 (30.0) | 9 (23.1)  |                    |
|                                                                                        | 3                     | 6 (18.8)  | 5 (17.9)  | 9 (25.7)  | 10 (25.0) | 10 (25.6) |                    |
|                                                                                        | 4                     | 2 (6.3)   | 7 (25.0)  | 5 (14.3)  | 2 (5.0)   | 3 (7.7)   |                    |
|                                                                                        | 5 – All of the time   | 1 (3.1)   | 1 (3.6)   | 2 (5.7)   | 3 (7.5)   | 2 (5.1)   |                    |
|                                                                                        | Non-Response          | 30        | 33        | 26        | 16        | 19        |                    |
| The current system enables me to create high quality documentation.                    | 1 – Disagree strongly | 0 (0.0)   | 7 (25.0)  | 10 (28.6) | 7 (17.5)  | 7 (17.9)  | <0.01 <sup>c</sup> |
|                                                                                        | 2                     | 1 (3.1)   | 6 (21.4)  | 5 (14.3)  | 4 (10.0)  | 5 (12.8)  |                    |
|                                                                                        | 3                     | 2 (6.3)   | 4 (14.3)  | 4 (11.4)  | 7 (17.5)  | 11 (28.2) |                    |
|                                                                                        | 4                     | 10 (31.3) | 7 (25.0)  | 10 (28.6) | 16 (40.0) | 10 (25.6) |                    |
|                                                                                        | 5 – Agree strongly    | 19 (59.4) | 4 (14.3)  | 6 (17.1)  | 6 (15.0)  | 6 (15.4)  |                    |
|                                                                                        | Non-Response          | 30        | 33        | 26        | 16        | 19        |                    |
| The current system enables my colleagues to create high quality documentation.         | 1 – Disagree strongly | 1 (3.1)   | 8 (28.6)  | 10 (28.6) | 6 (15.0)  | 7 (17.9)  | <0.02 <sup>b</sup> |
|                                                                                        | 2                     | 1 (3.1)   | 7 (25.0)  | 5 (14.3)  | 6 (15.0)  | 7 (17.9)  |                    |
|                                                                                        | 3                     | 6 (18.8)  | 5 (17.9)  | 5 (14.3)  | 12 (30.0) | 10 (25.6) |                    |
|                                                                                        | 4                     | 8 (25.0)  | 5 (17.9)  | 9 (25.7)  | 11 (27.5) | 12 (30.8) |                    |
|                                                                                        | 5 – Agree strongly    | 16 (50.0) | 3 (10.7)  | 6 (17.1)  | 5 (12.5)  | 3 (7.7)   |                    |
|                                                                                        | Non-Response          | 30        | 33        | 26        | 16        | 19        |                    |

|                                                                                                              |                         |           |           |           |           |           |                     |
|--------------------------------------------------------------------------------------------------------------|-------------------------|-----------|-----------|-----------|-----------|-----------|---------------------|
| The current system supports my clinical thought process.                                                     | 1 – Disagree strongly   | 0 (0.0)   | 11 (39.3) | 11 (31.4) | 7 (17.5)  | 9 (23.1)  | < 0.01 <sup>c</sup> |
|                                                                                                              | 2                       | 1 (3.1)   | 9 (32.1)  | 8 (22.9)  | 9 (22.5)  | 5 (12.8)  |                     |
|                                                                                                              | 3                       | 1 (3.1)   | 2 (7.1)   | 6 (17.1)  | 9 (22.5)  | 14 (35.9) |                     |
|                                                                                                              | 4                       | 5 (15.6)  | 5 (17.9)  | 7 (20.0)  | 12 (30.0) | 8 (20.5)  |                     |
|                                                                                                              | 5 – Agree strongly      | 25 (78.1) | 1 (3.6)   | 3 (8.6)   | 3 (7.5)   | 3 (7.7)   |                     |
|                                                                                                              | Non-Response            | 30        | 33        | 26        | 16        | 19        |                     |
| The current system does not interfere with face-to-face contact with patients.                               | 1 – Disagree strongly   | 0 (0.0)   | 12 (42.9) | 22 (62.9) | 17 (42.5) | 18 (46.2) | < 0.01 <sup>c</sup> |
|                                                                                                              | 2                       | 0 (0.0)   | 12 (42.9) | 7 (20.0)  | 15 (37.5) | 12 (30.8) |                     |
|                                                                                                              | 3                       | 3 (9.4)   | 1 (3.6)   | 4 (11.4)  | 6 (15.0)  | 6 (15.4)  |                     |
|                                                                                                              | 4                       | 7 (21.9)  | 2 (7.1)   | 2 (5.7)   | 2 (5.0)   | 2 (5.1)   |                     |
|                                                                                                              | 5 – Agree strongly      | 22 (68.8) | 1 (3.6)   | 0 (0.0)   | 0 (0.0)   | 1 (2.6)   |                     |
|                                                                                                              | Non-Response            | 30        | 33        | 26        | 16        | 19        |                     |
| The current system supports meaningful interaction with patients.                                            | 1 – Disagree strongly   | 0 (0.0)   | 9 (32.1)  | 16 (45.7) | 11 (27.5) | 15 (38.5) | < 0.01 <sup>c</sup> |
|                                                                                                              | 2                       | 0 (0.0)   | 11 (39.3) | 8 (22.9)  | 18 (45.0) | 11 (28.2) |                     |
|                                                                                                              | 3                       | 2 (6.3)   | 4 (14.3)  | 7 (20.0)  | 7 (17.5)  | 8 (20.5)  |                     |
|                                                                                                              | 4                       | 7 (21.9)  | 3 (10.7)  | 2 (5.7)   | 4 (10.0)  | 4 (10.3)  |                     |
|                                                                                                              | 5 – Agree strongly      | 23 (71.9) | 1 (3.6)   | 2 (5.7)   | 0 (0.0)   | 1 (2.6)   |                     |
|                                                                                                              | Non-Response            | 30        | 33        | 26        | 16        | 19        |                     |
| The current system has improved patient safety.                                                              | 1 – Disagree strongly   | 1 (3.1)   | 7 (25.0)  | 7 (20.0)  | 7 (17.5)  | 6 (15.4)  | 0.43 <sup>c</sup>   |
|                                                                                                              | 2                       | 7 (21.9)  | 5 (17.9)  | 5 (14.3)  | 4 (10.0)  | 6 (15.4)  |                     |
|                                                                                                              | 3                       | 14 (43.8) | 6 (21.4)  | 11 (31.4) | 10 (25.0) | 11 (28.2) |                     |
|                                                                                                              | 4                       | 6 (18.8)  | 8 (28.6)  | 7 (20.0)  | 13 (32.5) | 14 (35.9) |                     |
|                                                                                                              | 5 – Agree strongly      | 4 (12.5)  | 2 (7.1)   | 5 (14.3)  | 6 (15.0)  | 2 (5.1)   |                     |
|                                                                                                              | Non-Response            | 30        | 33        | 26        | 16        | 19        |                     |
| The current system reminds me of important actions or items.                                                 | 1 – Disagree strongly   | 7 (21.9)  | 5 (18.5)  | 9 (25.7)  | 6 (15.0)  | 7 (17.9)  | 0.09 <sup>c</sup>   |
|                                                                                                              | 2                       | 8 (25.0)  | 4 (14.8)  | 6 (17.1)  | 5 (12.5)  | 4 (10.3)  |                     |
|                                                                                                              | 3                       | 11 (34.4) | 7 (25.9)  | 4 (11.4)  | 7 (17.5)  | 9 (23.1)  |                     |
|                                                                                                              | 4                       | 3 (9.4)   | 10 (37.0) | 13 (37.1) | 15 (37.5) | 18 (46.2) |                     |
|                                                                                                              | 5 – Agree strongly      | 3 (9.4)   | 1 (3.7)   | 3 (8.6)   | 7 (17.5)  | 1 (2.6)   |                     |
|                                                                                                              | Non-Response            | 30        | 34        | 26        | 16        | 19        |                     |
| The current system enables me to complete my documentation in a timely manner.                               | 1 – Disagree strongly   | 0 (0.0)   | 6 (21.4)  | 10 (28.6) | 10 (25.0) | 8 (20.5)  | < 0.01 <sup>c</sup> |
|                                                                                                              | 2                       | 4 (12.5)  | 7 (25.0)  | 5 (14.3)  | 4 (10.0)  | 8 (20.5)  |                     |
|                                                                                                              | 3                       | 3 (9.4)   | 7 (25.0)  | 10 (28.6) | 14 (35.0) | 8 (20.5)  |                     |
|                                                                                                              | 4                       | 6 (18.8)  | 7 (25.0)  | 7 (20.0)  | 9 (22.5)  | 11 (28.2) |                     |
|                                                                                                              | 5 – Agree strongly      | 19 (59.4) | 1 (3.6)   | 3 (8.6)   | 3 (7.5)   | 4 (10.3)  |                     |
|                                                                                                              | Non-Response            | 30        | 33        | 26        | 16        | 19        |                     |
| Rate the impact the current system has had on your efficiency and workflow, compared to the previous system. | 1 – Much less efficient | 4 (14.3)  | 8 (28.6)  | 11 (31.4) | 11 (27.5) | 9 (23.1)  | 0.97 <sup>b</sup>   |
|                                                                                                              | 2                       | 8 (28.6)  | 10 (35.7) | 13 (37.1) | 13 (32.5) | 11 (28.2) |                     |
|                                                                                                              | 3                       | 8 (28.6)  | 4 (14.3)  | 6 (17.1)  | 7 (17.5)  | 8 (20.5)  |                     |
|                                                                                                              | 4                       | 7 (25.0)  | 5 (17.9)  | 4 (11.4)  | 7 (17.5)  | 9 (23.1)  |                     |
|                                                                                                              | 5 – Much more efficient | 1 (3.6)   | 1 (3.6)   | 1 (2.9)   | 2 (5.0)   | 2 (5.1)   |                     |
|                                                                                                              | Non-Response            | 34        | 33        | 26        | 16        | 19        |                     |
| How much MiChart training have you received?                                                                 | 1 – None                | 8 (25.0)  | 0 (0.0)   | 0 (0.0)   | 0 (0.0)   | 0 (0.0)   | ----- <sup>e</sup>  |
|                                                                                                              | 2                       | 16 (50.0) | 0 (0.0)   | 0 (0.0)   | 0 (0.0)   | 0 (0.0)   |                     |
|                                                                                                              | 3 – All                 | 8 (25.0)  | 0 (0.0)   | 0 (0.0)   | 0 (0.0)   | 0 (0.0)   |                     |

|                                                               | Non-response                                                                  | 30                        | 61        | 61        | 56        | 58        |                   |
|---------------------------------------------------------------|-------------------------------------------------------------------------------|---------------------------|-----------|-----------|-----------|-----------|-------------------|
| The amount of training you received for MiChart was:          | 1 – Very inadequate                                                           | 3 (37.5)                  | 7 (25.0)  | 5 (14.3)  | 1 (2.5)   | 3 (7.7)   | 0.17 <sup>c</sup> |
|                                                               | 2                                                                             | 2 (25.0)                  | 7 (25.0)  | 9 (25.7)  | 7 (17.5)  | 9 (23.1)  |                   |
|                                                               | 3                                                                             | 1 (12.5)                  | 4 (14.3)  | 6 (17.1)  | 11 (27.5) | 5 (12.8)  |                   |
|                                                               | 4                                                                             | 2 (25.0)                  | 7 (25.0)  | 9 (25.7)  | 10 (25.0) | 16 (41.0) |                   |
|                                                               | 5 – Very adequate                                                             | 0 (0.0)                   | 3 (10.7)  | 6 (17.1)  | 11 (27.5) | 6 (15.4)  |                   |
|                                                               | Non-Response                                                                  | 54                        | 33        | 26        | 16        | 19        |                   |
|                                                               | Estimate your prior MiChart experience before coming to UM.                   | 1 – None                  | 31 (96.9) | 26 (92.9) | 32 (91.4) | 38 (95.0) | 36 (92.3)         |
| 2                                                             |                                                                               | 0 (0.0)                   | 0 (0.0)   | 2 (5.7)   | 0 (0.0)   | 0 (0.0)   |                   |
| 3                                                             |                                                                               | 1 (3.1)                   | 1 (3.6)   | 1 (2.9)   | 1 (2.5)   | 2 (5.1)   |                   |
| 4                                                             |                                                                               | 0 (0.0)                   | 1 (3.6)   | 0 (0.0)   | 1 (2.5)   | 1 (2.6)   |                   |
| 5 – More than four years                                      |                                                                               | 0 (0.0)                   | 0 (0.0)   | 0 (0.0)   | 0 (0.0)   | 0 (0.0)   |                   |
| Non-Response                                                  |                                                                               | 30                        | 33        | 26        | 16        | 19        |                   |
| Rate your current overall job satisfaction.                   |                                                                               | 1 – Very unsatisfied      | 0 (0.0)   | 2 (7.1)   | 4 (11.4)  | 2 (5.0)   | 4 (10.3)          |
|                                                               | 2                                                                             | 2 (6.3)                   | 3 (10.7)  | 4 (11.4)  | 6 (15.0)  | 7 (17.9)  |                   |
|                                                               | 3                                                                             | 3 (9.4)                   | 2 (7.1)   | 3 (8.6)   | 8 (20.0)  | 3 (7.7)   |                   |
|                                                               | 4                                                                             | 9 (28.1)                  | 9 (32.1)  | 10 (28.6) | 8 (20.0)  | 11 (28.2) |                   |
|                                                               | 5 – Very satisfied                                                            | 18 (56.3)                 | 12 (42.9) | 14 (40.0) | 16 (40.0) | 14 (35.9) |                   |
|                                                               | Non-Response                                                                  | 30                        | 33        | 26        | 16        | 19        |                   |
|                                                               | Estimate the impact the current system has had on your job satisfaction.      | 1 – Large negative impact | 1 (3.1)   | 5 (17.9)  | 6 (17.1)  | 7 (17.5)  | 7 (17.9)          |
| 2                                                             |                                                                               | 4 (12.5)                  | 13 (46.4) | 13 (37.1) | 13 (32.5) | 16 (41.0) |                   |
| 3                                                             |                                                                               | 18 (56.3)                 | 4 (14.3)  | 12 (34.3) | 16 (40.0) | 9 (23.1)  |                   |
| 4                                                             |                                                                               | 8 (25.0)                  | 4 (14.3)  | 3 (8.6)   | 3 (7.5)   | 7 (17.9)  |                   |
| 5 – Large positive impact                                     |                                                                               | 1 (3.1)                   | 2 (7.1)   | 1 (2.9)   | 1 (2.5)   | 0 (0.0)   |                   |
| Non-Response                                                  |                                                                               | 30                        | 33        | 26        | 16        | 19        |                   |
| MiChart will allow me to provide better care for my patients. |                                                                               | 1 – Disagree strongly     | 5 (15.6)  | 4 (14.3)  | 7 (20.0)  | 8 (20.0)  | 9 (23.1)          |
|                                                               | 2                                                                             | 4 (12.5)                  | 10 (35.7) | 7 (20.0)  | 4 (10.0)  | 10 (25.6) |                   |
|                                                               | 3                                                                             | 10 (31.3)                 | 6 (21.4)  | 11 (31.4) | 17 (42.5) | 9 (23.1)  |                   |
|                                                               | 4                                                                             | 9 (28.1)                  | 5 (17.9)  | 8 (22.9)  | 9 (22.5)  | 10 (25.6) |                   |
|                                                               | 5 – Agree strongly                                                            | 4 (12.5)                  | 3 (10.7)  | 2 (5.7)   | 2 (5.0)   | 1 (2.6)   |                   |
|                                                               | Non-Response                                                                  | 30                        | 33        | 26        | 16        | 19        |                   |
|                                                               | Would you like to keep the current system or switch back to the previous one? | 1 – Definitely keep       | 6 (18.8)  | 5 (17.9)  | 5 (14.3)  | 10 (25.0) | 10 (25.6)         |
| 2                                                             |                                                                               | 6 (18.8)                  | 9 (32.1)  | 16 (45.7) | 15 (37.5) | 11 (28.2) |                   |
| 3                                                             |                                                                               | 2 (6.3)                   | 6 (21.4)  | 3 (8.6)   | 7 (17.5)  | 9 (23.1)  |                   |
| 4                                                             |                                                                               | 13 (40.6)                 | 5 (17.9)  | 4 (11.4)  | 4 (10.0)  | 6 (15.4)  |                   |
| 5 – Definitely switch                                         |                                                                               | 5 (15.6)                  | 3 (10.7)  | 7 (20.0)  | 4 (10.0)  | 3 (7.7)   |                   |
| Non-Response                                                  |                                                                               | 30                        | 33        | 26        | 16        | 19        |                   |
| MiChart has eliminated work that I used to have to do.        |                                                                               | 1 – Disagree strongly     | 0 (0.0)   | 8 (28.6)  | 15 (42.9) | 10 (25.0) | 12 (30.8)         |
|                                                               | 2                                                                             | 0 (0.0)                   | 7 (25.0)  | 8 (22.9)  | 14 (35.0) | 11 (28.2) |                   |
|                                                               | 3                                                                             | 0 (0.0)                   | 5 (17.9)  | 5 (14.3)  | 2 (5.0)   | 6 (15.4)  |                   |
|                                                               | 4                                                                             | 0 (0.0)                   | 6 (21.4)  | 4 (11.4)  | 10 (25.0) | 7 (17.9)  |                   |
|                                                               | 5 – Agree strongly                                                            | 0 (0.0)                   | 2 (7.1)   | 3 (8.6)   | 4 (10.0)  | 3 (7.7)   |                   |
|                                                               | Non-Response                                                                  | 62                        | 33        | 26        | 16        | 19        |                   |
|                                                               | MiChart has created new work that I now                                       | 1 – Disagree strongly     | 0 (0.0)   | 0 (0.0)   | 1 (2.9)   | 1 (2.5)   | 0 (0.0)           |
| 2                                                             |                                                                               | 0 (0.0)                   | 1 (3.6)   | 0 (0.0)   | 0 (0.0)   | 1 (2.6)   |                   |

|          |                    |         |           |           |           |           |
|----------|--------------------|---------|-----------|-----------|-----------|-----------|
| must do. | 3                  | 0 (0.0) | 1 (3.6)   | 3 (8.6)   | 3 (7.5)   | 5 (12.8)  |
|          | 4                  | 0 (0.0) | 12 (42.9) | 11 (31.4) | 14 (35.0) | 14 (35.9) |
|          | 5 – Agree strongly | 0 (0.0) | 14 (50.0) | 20 (57.1) | 22 (55.0) | 19 (48.7) |
|          | Non-Response       | 62      | 33        | 26        | 16        | 19        |

Grey filled boxes denote questions not included on the survey at the indicated time

<sup>a</sup> All comparison tests are performed on only the survey times where that question was asked (i.e., grey boxes omitted from analyses), and only considering responses

<sup>b</sup> Chi-square test

<sup>c</sup> Fisher exact test

<sup>d</sup> Non-Response can be due to item non-response or unit non-response

<sup>e</sup> No comparison test; question only present at one survey time
